# Supplementary material for: Clinical Outcomes of Pencil Beam Scanning Proton Therapy in Locally Advanced Non-Small Cell Lung Cancer: Propensity Score Analysis
Source: MDPI journal article supplement (doi:10.3390/cancers13143497), 2021-07-13
Supplement: s1 [file s1]

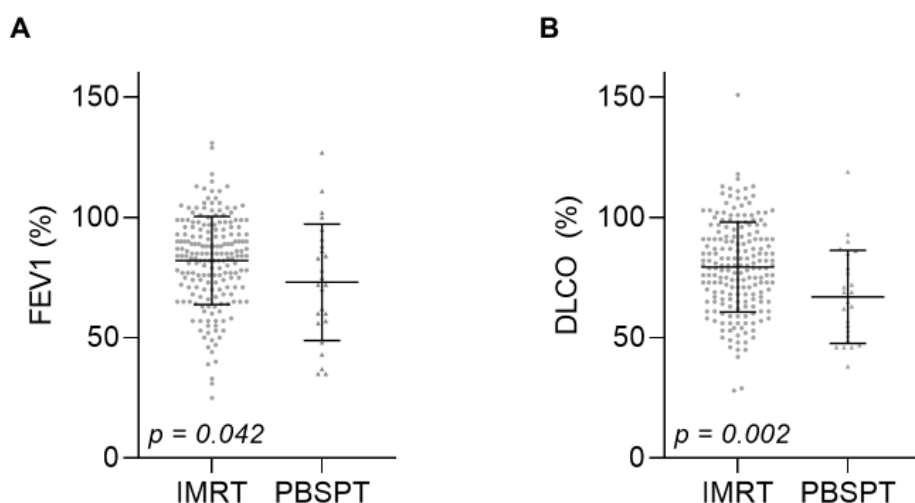

**Figure S1.** Baseline pulmonary function tests according to treatment modality: forced expiratory volume in 1 second (A); diffusing capacity of the lung for carbon monoxide (B). \* Lines refer to median and interquartile range. Abbreviations: IMRT, intensity-modulated radiation therapy; PBSPT, pencil beam scanning proton therapy.

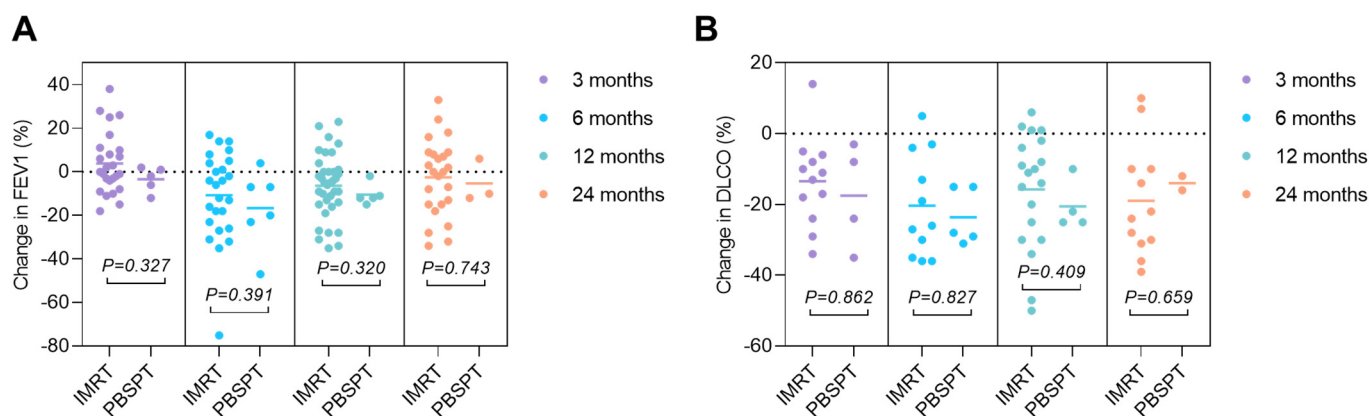

**Figure S2.** Changes in pulmonary function test after treatment: forced expiratory volume in 1 second (A); diffusing capacity of the lung for carbon monoxide (B). (Each dot represents results of pulmonary function tests from individual patients).

**Table S1.** Dose volume parameters according to the treatment modality.

|                                                | IMRT<br><i>n</i> = 194 | PBSPT<br><i>n</i> = 25 | <i>p</i> -value |
|------------------------------------------------|------------------------|------------------------|-----------------|
| Median total dose (range), GyE                 | 66.0 (60.0-74.0)       | 66.0 (59.4-74.0)       | 0.580           |
| Fractional dose, <i>n</i> (%)                  |                        |                        |                 |
| 2.0 GyE                                        | 9 (36.0)               | 9 (36.0)               | 0.398           |
| 2.2 GyE                                        | 16 (64.0)              | 16 (64.0)              |                 |
| Median biologically effective dose (range), Gy | 80.5 (72.0-88.8)       | 80.5 (72.0-88.0)       | 0.650           |
|                                                | Median [IQR]           | Median [IQR]           |                 |
| Gross tumor volume, cc                         | 98.8 [56.2;192.8]      | 118.4 [88.7;238.6]     | 0.154           |
| CTV, cc                                        | 283.6 [184.8;475.9]    | 369.0 [263.5;512.6]    | 0.107           |
| PTV, cc                                        | 532.6 [366.4;776.7]    | 611.4 [441.9;887.2]    | 0.150           |
| CTV <sub>95%</sub> , %                         | 99.9 [99.4;100.0]      | 99.9 [99.3;100.0]      | 0.905           |
| CTV <sub>100%</sub> , %                        | 96.2 [95.0;97.3]       | 96.7 [95.0;99.0]       | 0.314           |
| PTV <sub>95%</sub> , %                         | 97.1 [94.1;99.0]       | 94.8 [93.6;97.1]       | 0.013           |
| Total lung                                     |                        |                        |                 |
| Mean dose, GyE                                 | 18.9 [15.0;21.3]       | 14.0 [11.8;16.0]       | <0.001          |
| V <sub>5GyE</sub> , %                          | 54.7 [47.1;63.3]       | 32.9 [27.2;40.5]       | <0.001          |
| V <sub>10GyE</sub> , %                         | 43.3 [35.9;49.8]       | 28.6 [23.7;36.1]       | <0.001          |

|                        |                  |                  |        |
|------------------------|------------------|------------------|--------|
| V <sub>20GyE</sub> , % | 32.1 [25.6;37.3] | 23.9 [20.8;27.4] | <0.001 |
| Esophagus              |                  |                  |        |
| Maximum dose, GyE      | 71.2 [68.7;72.9] | 69.7 [68.6;71.5] | 0.042  |
| V <sub>45GyE</sub> , % | 27.5 [17.7;37.3] | 26.2 [10.2;38.8] | 0.901  |
| V <sub>55GyE</sub> , % | 21.1 [10.1;29.5] | 20.7 [6.3;32.2]  | 0.774  |
| V <sub>66GyE</sub> , % | 7.0 [0.7;16.1]   | 9.5 [0.1;18.1]   | 0.484  |
| Heart                  |                  |                  |        |
| Mean dose, GyE         | 12.8 [6.8;20.9]  | 7.7 [5.3;12.6]   | 0.006  |
| V <sub>30GyE</sub> , % | 14.6 [5.2;27.3]  | 9.1 [6.4;17.2]   | 0.091  |
| V <sub>45GyE</sub> , % | 7.7 [2.8;17.3]   | 5.8 [3.0;11.2]   | 0.273  |
| V <sub>50GyE</sub> , % | 5.7 [2.0;13.2]   | 4.8 [2.4;9.3]    | 0.517  |
| Spinal cord            |                  |                  |        |
| Maximum dose, GyE      | 42.6 [40.5;44.6] | 31.0 [22.6;38.4] | <0.001 |

Abbreviations: IMRT, intensity-modulated radiation therapy; PBSPT, pencil beam scanning proton therapy; SMD, standardized mean difference; GyE, gray equivalent; CTV, clinical target volume; PTV, planning target volume; V<sub>XX%</sub> = volume receiving XX% of the prescription dose; V<sub>XXGyE</sub> = volume receiving more than XX GyE.

**Table S2.** Comparison of target coverage and normal tissue sparing with matched intensity-modulated radiation therapy (IMRT) and intensity-modulated proton therapy (PBSPT) plans.

|                          | IMRT<br>Median [IQR] | PBSPT<br>Median [IQR] | <i>p</i> -value |
|--------------------------|----------------------|-----------------------|-----------------|
| <b>Target</b>            |                      |                       |                 |
| CTV <sub>min</sub> , GyE | 55.8 [43.7;62.0]     | 67.0 [49.9;59.7]      | 0.711           |
| CTV <sub>max</sub> , GyE | 73.3 [71.5;75.2]     | 72.7 [71.5;73.8]      | 0.442           |
| V <sub>95%</sub> , %     | 99.8 [99.3;100.0]    | 99.9 [99.3;100.0]     | 0.173           |
| V <sub>100%</sub> , %    | 97.4 [96.4;98.3]     | 96.7 [95.0;99.0]      | 0.275           |
| PTV <sub>min</sub> , GyE | 35.0 [30.6;51.0]     | 39.8 [26.7;45.6]      | 0.916           |
| PTV <sub>max</sub> , GyE | 73.2 [71.6;75.2]     | 72.7 [71.6;73.8]      | 0.252           |
| V <sub>95%</sub> , %     | 96.7 [93.9;98.5]     | 94.8 [93.5;97.1]      | 0.075           |
| V <sub>100%</sub> , %    | 85.3 [82.4;86.6]     | 85.8 [80.6;87.1]      | 0.653           |
| <b>Normal organ</b>      |                      |                       |                 |
| Both Lung                |                      |                       |                 |
| D <sub>mean</sub> , GyE  | 18.0 [15.1;23.1]     | 14.0 [11.8;16.0]      | <0.001          |
| V <sub>5GyE</sub> , %    | 52.4 [48.7;69.6]     | 32.9 [27.2;40.5]      | <0.001          |
| V <sub>10GyE</sub> , %   | 40.1 [34.8;49.8]     | 28.6 [23.7;36.1]      | <0.001          |
| V <sub>20GyE</sub> , %   | 28.7 [26.9;38.5]     | 23.9 [20.8;27.4]      | <0.001          |
| Esophagus                |                      |                       |                 |
| D <sub>max</sub> , GyE   | 71.0 [65.2;73.1]     | 69.7 [68.6;71.5]      | 0.241           |
| V <sub>45GyE</sub> , %   | 22.4 [8.1;29.3]      | 26.1 [10.2;38.8]      | 0.017           |
| V <sub>55GyE</sub> , %   | 15.7 [4.1;25.9]      | 20.7 [6.3;32.2]       | 0.027           |
| V <sub>66GyE</sub> , %   | 4.3 [0;15.0]         | 9.5 [0.0;18.1]        | 0.001           |
| Heart                    |                      |                       |                 |
| D <sub>mean</sub> , GyE  | 14.1 [9.6;23.9]      | 7.7 [5.3;12.6]        | <0.001          |
| V <sub>30GyE</sub> , %   | 16.0 [11.9;35.0]     | 9.1 [6.4;17.2]        | <0.001          |
| V <sub>45GyE</sub> , %   | 8.3 [5.2;17.4]       | 5.8 [3.0;11.2]        | 0.000           |
| V <sub>50GyE</sub> , %   | 8.3 [3.7;13.7]       | 4.8 [2.4;9.3]         | 0.001           |
| Spinal cord              |                      |                       |                 |
| D <sub>max</sub> , GyE   | 41.7 [39.3;44.0]     | 31.0 [22.6;38.4]      | 0.275           |

Abbreviations: IMRT, intensity-modulated radiation therapy; PBSPT, pencil beam scanning proton therapy; IQR, interquartile range; GyE, gray relative biologic effectiveness; V<sub>XX%</sub> = volume receiving XX% of the prescription dose; D<sub>mean</sub>, mean dose; D<sub>max</sub>, maximum dose; V<sub>XXGyE</sub> = volume receiving more than XX GyE.
